# Supplementary material for: Economic and environmental sustainability of bio-based HMF production and recovery from lignocellulosic biomass
Source: Royal Society of Chemistry journal article supplement (doi:10.1039/d4gc04270k), 2024-01-01
Supplement: d4gc04270k1.pdf [file d4gc04270k1.pdf]

## **Supplementary**

### **S1. Process Specifications and Assumptions**

#### **S1.1. Feedstock composition**

Composition of transgenic sugarcane-oilcane (Table S1) were consistent with previous literatures.<sup>1,2</sup> Feedstock lipid content was varied from 5 to 15 % w w<sup>-1</sup> in system analysis under uncertainties. The lipid content of oilcane increased at an expense of sucrose content, which was calculated by an energy balance approach from previous techno-economic analyses using oilcane as feedstock.<sup>1,2</sup>

**Table S1. Chemical composition of transgenic sugarcane-oilcane at baseline assumption of lipid content (5 % w w<sup>-1</sup>).**

| Components                          | Composition [% w w <sup>-1</sup> ] |
|-------------------------------------|------------------------------------|
| Water                               | 70.00                              |
| Glucose                             | 0.91                               |
| Sucrose                             | 10.35                              |
| Ash                                 | 0.60                               |
| Glucan (Cellulose)                  | 7.12                               |
| Hemicellulose <sup>[a]</sup>        | 4.20                               |
| Lignin                              | 3.81                               |
| Solids                              | 1.50                               |
| Triolein <sup>[b]</sup>             | 1.20                               |
| Oleic acid <sup>[b]</sup>           | 0.15                               |
| Phosphatidylinositol <sup>[b]</sup> | 0.15                               |

<sup>[a]</sup> Hemicellulose fraction consists of 82.5%, 21.9%, 5.63% and 1.62 % w w<sup>-1</sup> of xylan, acetate, arabinan, and galactan, respectively.

<sup>[b]</sup> Triolein, oleic acid, and phosphatidylinositol adds up to totally 5% w w<sup>-1</sup> of vegetative lipid in dry oilcane.

#### **S1.2. Hydrothermal pretreatment**

Hydrothermal pretreatment of oilcane bagasse was operated at 210 °C for 5 min. The pretreatment conditions were optimized for oilcane bagasse to maximize the production of HMF and furfural without affecting yield of cellulosic sugars or degrading vegetative lipids.<sup>3</sup> Other specifications and designs of the pretreatment reactor system followed previous study.<sup>2</sup>

Pretreatment reactions and their conversion percentages (Table S2) were modified from Humbird et al based on bench-scale experimental data.<sup>2-4</sup>

**Table S2. Hydrothermal pretreatment specifications.**

|                                            | Baseline condition |
|--------------------------------------------|--------------------|
| Temperature [°C]                           | 210                |
| Reaction time [min]                        | 5                  |
| Solids loading [% w w <sup>-1</sup> ]      | 50                 |
| Glucan to glucose conversion [% of glucan] | 21.45              |
| Glucan to HMF conversion [% of glucan]     | 14.40              |
| Xylan to xylose conversion [% of xylan]    | 31.23              |
| Xylan to furfural conversion [% of xylan]  | 51.10              |

### **S1.3. Nanofiltration systems**

A unit operation for the nanofiltration system was modeled and designed using BioSTEAM. The nanofiltration system unit operation split chemical components of its input stream between two output streams (retentate and permeate) based on mass. Capital and operating costs of the unit were estimated based on previous literatures using membrane area and volumetric flow rate into the system.<sup>5-7</sup> Membrane purchase and replacement costs were calculated from the cost of a nanofiltration spiral-wound membrane (\$20.8 m<sup>-2</sup>) and a membrane lifetime of 2.5 years in the baseline biorefinery.<sup>5, 6</sup> Costs of instruments and controls, tanks and frames, and miscellaneous facilities were scaled using membrane area.<sup>5</sup> Operating costs to clean and regenerate membrane were estimated based on volumetric flow rate into the nanofiltration system.<sup>5</sup> Expenses incurred by pumps were estimated individually using BioSTEAM's built-in methods.<sup>8</sup> Fractions of chemical components recovered in retentates of the 1<sup>st</sup> and 2<sup>nd</sup> nanofiltration systems (Table S3) were determined based on bench-scale experimental data.<sup>3</sup>

**Table S3. Percentage of chemical components (% w w<sup>-1</sup>) recovered in the retentate of the 1<sup>st</sup> and 2<sup>nd</sup> nanofiltration systems in the baseline oilcane biorefinery.**

| Chemicals        | 1 <sup>st</sup> Nanofiltration system | 2 <sup>nd</sup> Nanofiltration system |
|------------------|---------------------------------------|---------------------------------------|
| HMF              | 40.72                                 | 47.55                                 |
| Furfural         | 59.59                                 | 78.82                                 |
| Glucose          | 98.39                                 | 100.00                                |
| Xylose           | 98.18                                 | 100.00                                |
| Arabinose        | 94.52                                 | 100.00                                |
| Acetic acid      | 84.28                                 | 77.54                                 |
| Oligosaccharides | 100.00                                | N/A <sup>[a]</sup>                    |
| Soluble lignin   | 100.00                                | N/A <sup>[a]</sup>                    |

#### S1.4. Microbial lipid production

Pretreated biomass residues were enzymatically hydrolyzed by cellulase at 48 °C for 72 hr. Specifications and modeling of enzymatic saccharification were consistent with previous studies.<sup>2</sup> Enzymatic hydrolysis reactions were modified to obtain a glucan-to-glucose conversion of 93.47% based on bench-scale experimental data.<sup>3</sup> The enzymatic hydrolysate were combined with oilcane juice and concentrated retentate from the 1<sup>st</sup> nanofiltration system to produce microbial lipids using *R. toruloides* in aerated bioreactors. Designs, modelling and cost correlations of fermentation (Table S4) were consistent with Yoel et al.<sup>9</sup> The fermentation reactions of glucose and xylose included triolein production, cell growth and respiration. The batch time included loading, reaction, and cleaning time.

**Table S4. Fermentation specifications in the baseline oilcane biorefinery.**

|                                                     | Baseline condition |
|-----------------------------------------------------|--------------------|
| Temperature [°C]                                    | 32                 |
| Batch time [hr]                                     | 92.4               |
| Cleaning time [hr]                                  | 3                  |
| Maximum bioreactor volume [m <sup>3</sup> ]         | 500                |
| Glucose to triolein yield [% maximum]               | 54.55              |
| Xylose to triolein yield [% maximum]                | 54.55              |
| Productivity (g L <sup>-1</sup> ·hr <sup>-1</sup> ) | 0.31               |

### S1.5. Vegetative lipid recovery

Major fraction of vegetative lipids remained in the biomass residues after upstream processing (crushing, pretreatment and enzymatic hydrolysis). In the baseline biorefinery, 33.5% of vegetative lipids were obtained in juice, pretreatment liquor and hydrolysate and sent to wastewater treatment.<sup>10</sup> The 66.5% of vegetative lipids remaining in the biomass residues post-saccharification were extracted by hexane with a lipid extraction efficiency of 90%. A total of 60% of vegetative lipids in the oilcane stems were recovered and extracted to produce biodiesel.

### S2. Capital and Operating Costs

Technoeconomic analysis (TEA) of the biorefinery was performed using method and parameters adopted by previous studies (Table S5).<sup>1,2</sup> Raw material costs, labor cost, revenues and equipment costs are listed in Table S6 – S8.

**Table S5. Main parameters of TEA for the baseline oilcane biorefinery.**

| Parameters                  | Value        |
|-----------------------------|--------------|
| Project lifetime [yr]       | 30           |
| Annual operating days       | 330          |
| Internal rate of return [%] | 10           |
| Construction duration [yr]  | 3            |
| Depreciation schedule       | MACRS 7-year |
| Income tax                  | 21%          |

**Table S6. Breakdown of variable operating cost and revenues for the baseline oilcane biorefinery.**

|                               | Input                               | Unit price [\$<br>MT <sup>-1</sup> ] | Costs [MM\$<br>yr <sup>-1</sup> ] | Reference |
|-------------------------------|-------------------------------------|--------------------------------------|-----------------------------------|-----------|
| Raw materials                 | FGD lime                            | 81.90                                | 0.01                              | 11, 12    |
|                               | H3PO4                               | 573.53                               | 0.31                              | 11, 12    |
|                               | HCl                                 | 84.47                                | 0.00                              | 2, 12     |
|                               | N2                                  | 779.37                               | 0.11                              | 13        |
|                               | NaOH                                | 390.00                               | 0.00                              | 14        |
|                               | Boiler chemicals                    | 5.36                                 | 0.00                              | 15        |
|                               | Catalyst                            | 1489.70                              | 0.01                              | 2, 12     |
|                               | Caustic                             | 195.00                               | 7.45                              |           |
|                               | Cellulase                           | 12.91                                | 0.64                              | 2, 12     |
|                               | Cooling tower chemicals             | 2408.19                              | 0.00                              | 15        |
|                               | Lime                                | 8.35                                 | 0.01                              | 11, 12    |
|                               | Methanol                            | 536.00                               | 0.14                              | 13        |
|                               | Nanofiltration membrane             | 1.51E+11                             | 1.38                              | 6         |
|                               | Oilcane                             | 34.55                                | 91.21                             | 16        |
|                               | Pure glycerine                      | 1090.00                              | 12.56                             | 2, 12     |
| Utilities                     | Propane [\$ kJ <sup>-1</sup> ]      | 0.00                                 | 0.55                              | 8         |
|                               | Electricity [\$ kWh <sup>-1</sup> ] | 0.087                                | 14.17                             | 8         |
| By-products and credits       | Ash disposal                        | -31.80                               | -2.30                             | 2         |
|                               | Crude glycerol                      | 202.93                               | 5.60                              | 2, 12     |
| Variable operating cost (VOC) |                                     |                                      | 125.23                            | /         |
| Products                      | HMF                                 | 18020.67                             | 229.43                            | 17-19     |
|                               | Biodiesel                           | 1585.53                              | 168.44                            | 20        |
|                               | Furfural                            | 1898.38                              | 18.91                             | 12, 21    |

**Table S7. Breakdown of fixed operating cost for the baseline oilcane biorefinery.**

|                            | Notes               | Costs [MM\$ yr <sup>-1</sup> ] |
|----------------------------|---------------------|--------------------------------|
| Labor salary               | -                   | 2.50                           |
| Labor burden               | 90% of labor salary | 2.25                           |
| Maintenance                | 3.0% of ISBL        | 10.20                          |
| Property insurance         | 0.7% of FCI         | 6.76                           |
| Fixed operating cost (FOC) |                     | 21.72                          |

**Table S8. Breakdown of capital costs for the baseline oilcane biorefinery.**

|                                                | Notes        | Costs [MM\$] |
|------------------------------------------------|--------------|--------------|
| ISBL installed equipment cost (ISBL)           | -            | 340.07       |
| OSBL installed equipment cost                  | -            | 204.34       |
| Warehouse                                      | 4.0% of ISBL | 13.60        |
| Site development                               | 9.0% of ISBL | 30.61        |
| Additional piping                              | 4.5% of ISBL | 15.30        |
| Total direct cost (TDC)                        | -            | 603.92       |
| Proratable costs                               | 10.0% of TDC | 60.39        |
| Field expenses                                 | 10.0% of TDC | 60.39        |
| Construction                                   | 20.0% of TDC | 120.78       |
| Contingency                                    | 10.0% of TDC | 60.39        |
| Other indirect costs (start-up, permits, etc.) | 10.0% of TDC | 60.39        |
| Total indirect cost                            | -            | 362.35       |
| Fixed capital investment (FCI)                 | -            | 966.28       |
| Working capital                                | 5.0% of FCI  | 48.31        |
| Total capital investment (TCI)                 | -            | 1014.59      |

### S3. Life Cycle Assessment

Environmental impact of the biorefinery was estimated as one-hundred-year global warming potential (GWP<sub>100</sub>) in the form of kg CO<sub>2</sub> eq. (carbon dioxide equivalent) by conducting a cradle-to-biorefinery-gate life cycle assessment (LCA). Life cycle inventory and allocation factors (energy and economic) are listed in Table S9 – 10.

**Table S9. Life cycle inventory for the baseline oilcane biorefinery.**

|       | Material                               | Flow [kg yr <sup>-1</sup> ] | Characterization factor [kg CO <sub>2</sub> eq. kg <sup>-1</sup> input] |
|-------|----------------------------------------|-----------------------------|-------------------------------------------------------------------------|
| Input | FGD lime                               | 1.34E+05                    | 0.52                                                                    |
|       | H3PO4                                  | 5.37E+05                    | 1.00                                                                    |
|       | HCl                                    | 2.81E+03                    | 1.96                                                                    |
|       | NaOH                                   | 3.16E+02                    | 2.01                                                                    |
|       | Boiler chemicals                       | 4.37E+03                    | 1.56                                                                    |
|       | Catalyst                               | 7.92E+03                    | 0.73                                                                    |
|       | Caustic                                | 3.82E+07                    | 1.01                                                                    |
|       | Cellulase                              | 4.92E+07                    | 0.40                                                                    |
|       | Cooling tower chemicals                | 7.44E-13                    | 0.26                                                                    |
|       | Lime                                   | 1.07E+06                    | 0.05                                                                    |
|       | Methanol                               | 2.54E+05                    | 0.45                                                                    |
|       | Nanofiltration membrane <sup>[a]</sup> | 9.13E-03                    | 2.54E+06                                                                |
|       | Oilcane                                | 2.64E+09                    | 0.04                                                                    |
|       | Pure glycerine                         | 1.15E+07                    | 1.67                                                                    |
|       | Electricity [kWh yr <sup>-1</sup> ]    | 1.63E+08                    | 0.39 [kg CO <sub>2</sub> eq. kWh <sup>-1</sup> ]                        |

|        |                |          |   |
|--------|----------------|----------|---|
| Output | HMF            | 1.27E+07 | - |
|        | Biodiesel      | 1.06E+08 | - |
|        | Furfural       | 9.96E+06 | - |
|        | Crude glycerol | 2.76E+07 | - |

<sup>[a]</sup> The characterization factor for nanofiltration membrane is based on the production and maintenance for a thin-film composite membrane.<sup>22, 23</sup>

**Table S10. Energy and economic allocation factors for the baseline oilcane biorefinery.**

| Allocation method | HMF  | Biodiesel | Furfural | Crude glycerol |
|-------------------|------|-----------|----------|----------------|
| Energy            | 0.06 | 0.82      | 0.05     | 0.07           |
| Economic          | 0.54 | 0.40      | 0.04     | 0.01           |

#### S4. Parameter distributions

**Table S11. Distribution of parameters included in uncertainty analysis.**

| #  | Parameter                                                                        | Baseline | Shape   | Lower | Upper | Reference |
|----|----------------------------------------------------------------------------------|----------|---------|-------|-------|-----------|
| 1  | HMF retention in 1st nanofiltration [%]                                          | 40.72    | Uniform | -50%  | +0%   | 3         |
| 2  | HMF retention in 2nd nanofiltration [%]                                          | 47.55    | Uniform | -50%  | +0%   | 3         |
| 3  | Furfural retention in 1st nanofiltration [%]                                     | 59.59    | Uniform | -50%  | +0%   | 3         |
| 4  | Furfural retention in 2nd nanofiltration [%]                                     | 78.82    | Uniform | -25%  | +25%  | 3         |
| 5  | Nanofiltration membrane lifetime [yr]                                            | 2.50     | Uniform | 0.5   | 5     | 6         |
| 6  | Nanofiltration membrane cost [\$ m <sup>-2</sup> ]                               | 20.80    | Uniform | -25%  | +25%  | 6         |
| 7  | Microbial lipid yield from glucose [% maximum]                                   | 54.55    | Uniform | -25%  | +25%  | 9, 24     |
| 8  | Microbial lipid yield from xylose [% maximum]                                    | 54.55    | Uniform | -25%  | +25%  | 9, 24     |
| 9  | Microbial lipid yield productivity (g L <sup>-1</sup> ·hr <sup>-1</sup> )        | 0.31     | Uniform | -25%  | +25%  | 9, 24     |
| 10 | Microbial lipid titer [g L <sup>-1</sup> ]                                       | 27.40    | Uniform | -25%  | +25%  | 9, 24     |
| 11 | Feedstock lipid content [%]                                                      | 5.00     | Uniform | 5     | 15    | 2         |
| 12 | Vegetative lipid recovery after processing (pretreatment & saccharification) [%] | 70.00    | Uniform | -25%  | +25%  | 10, 25    |
| 13 | Oilcane price [\$ kg <sup>-1</sup> ]                                             | 3.46     | Uniform | -25%  | +25%  | 16        |
| 14 | Furfural price [\$ kg <sup>-1</sup> ]                                            | 1.90     | Uniform | -25%  | +25%  | 21        |
| 15 | HMF price [\$ kg <sup>-1</sup> ]                                                 | 18.02    | Uniform | -25%  | +25%  | 17, 19    |
| 16 | Biodiesel price [\$ kg <sup>-1</sup> ]                                           | 1.59     | Uniform | -25%  | +25%  | 20        |
| 17 | Crude glycerol price [\$ kg <sup>-1</sup> ]                                      | 0.20     | Uniform | -25%  | +25%  | 2, 12     |
| 18 | Caustic price [\$ kg <sup>-1</sup> ]                                             | 0.20     | Uniform | -25%  | +25%  | 14        |
| 19 | Glycerine price [\$ kg <sup>-1</sup> ]                                           | 1.09     | Uniform | -25%  | +25%  | 26        |
| 20 | Natural gas price [\$ kg <sup>-1</sup> ]                                         | 0.20     | Uniform | -25%  | +25%  | 27        |
| 21 | Electricity price [\$ kWh <sup>-1</sup> ]                                        | 0.087    | Uniform | -25%  | +25%  | 28        |
| 22 | Pretreatment reactor system cost <sup>[a]</sup> [MM\$]                           | 19.67    | Uniform | -25%  | +25%  | 4         |

<sup>[a]</sup> Pretreatment reactor system cost is based on a system processing 92 MT hr<sup>-1</sup> of biomass.<sup>4</sup>

## S5. Monte Carlo Simulation Results

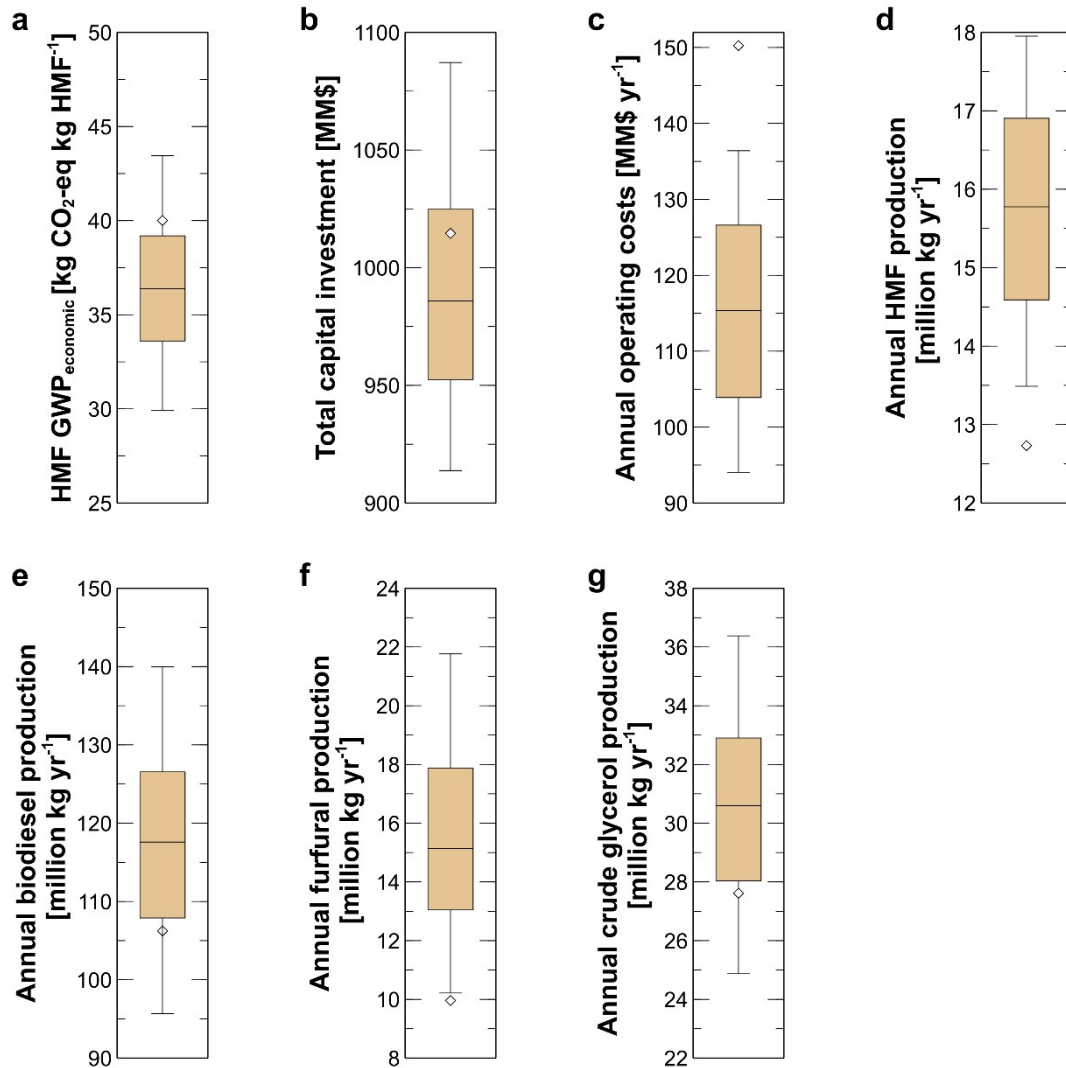

**Figure S1.** Box and whisker plots of a) economic-allocated GWP<sub>100</sub> of HMF, b) TCI, c) AOC, annual production of d) HMF, e) biodiesel, and f) furfural, and g) crude glycerol. Whiskers, boxes, and middle line are 5<sup>th</sup>/95<sup>th</sup>, 25<sup>th</sup>/75<sup>th</sup>, and 50<sup>th</sup> percentiles, respectively, from the Monte Carlo simulation results. Diamond markers represent values from baseline biorefinery.



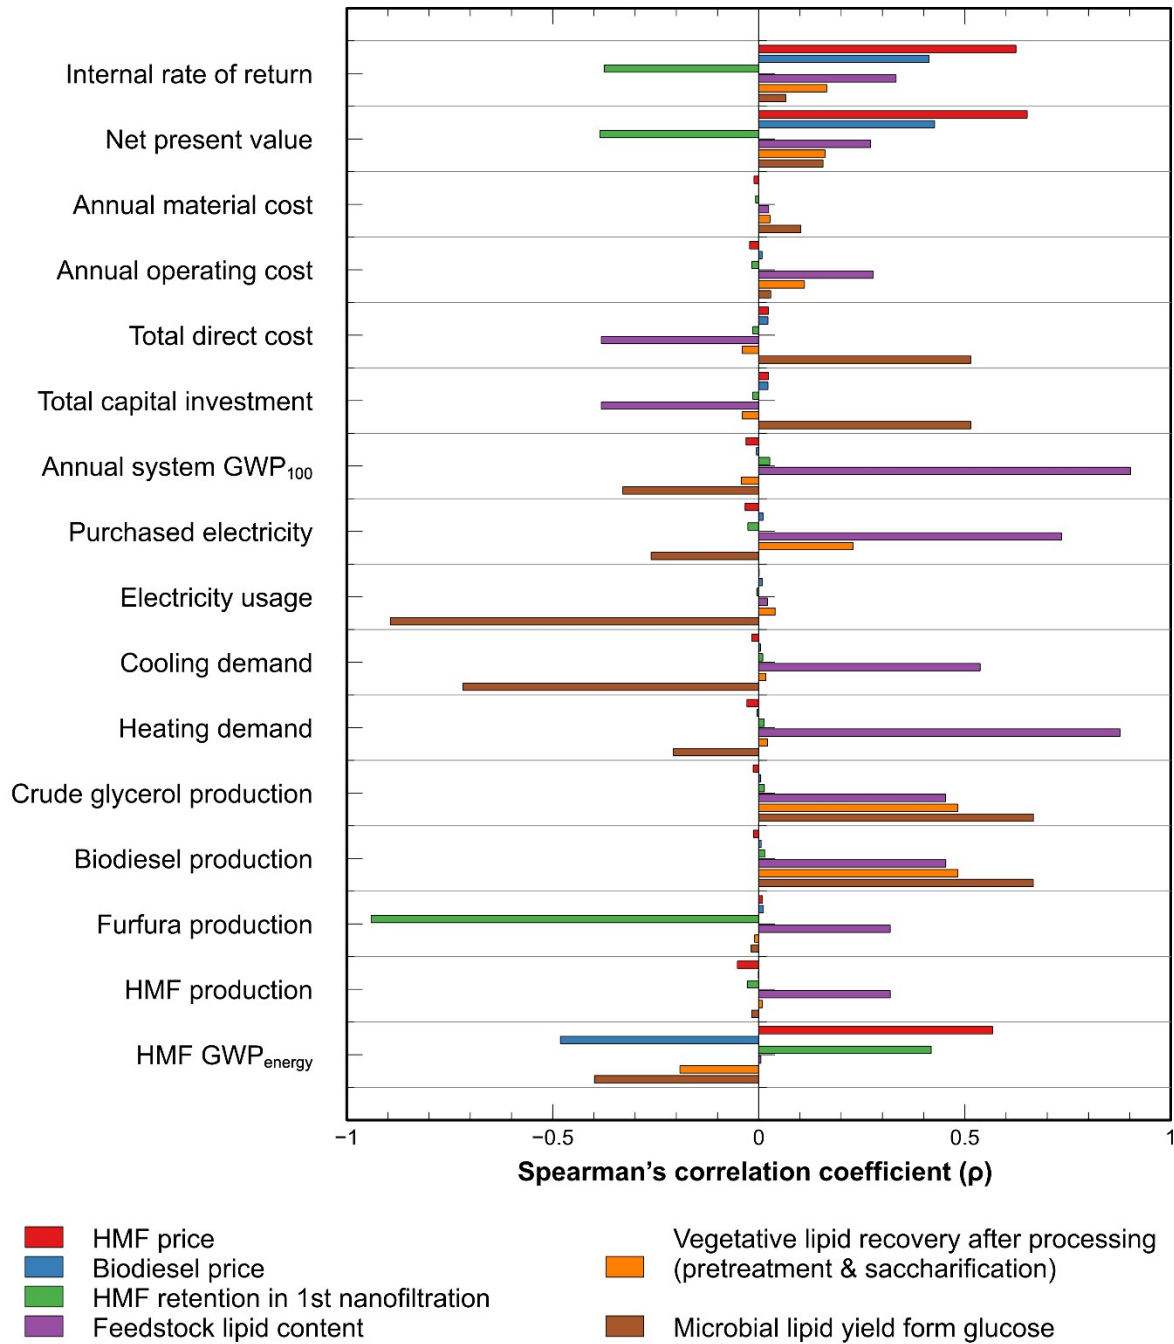

**Fig**

**re S2.** Spearman's  $\rho$  values between six parameters significantly affecting maximum feedstock purchasing price (MFPP) of feedstock and HMF GWP<sub>100</sub> using economic allocation, capital and operating costs, utility usage, annual production, and annual system GWP<sub>100</sub> of the biorefinery.

**References**

1. H. Huang, S. Long and V. Singh, *Biofuels, Bioproducts and Biorefining*, 2016, **10**, 299-315.
2. Y. R. Cortés-Peña, C. Kurambhatti, K. Eilts, V. Singh and J. S. Guest, *ACS Sustainable Chemistry & Engineering*, 2022, **10**, 13980-13990.
3. Y. Jia, S. Maitra and V. Singh, *Bioresource Technology*, 2023, **371**, 128630.
4. D. Humbird, R. Davis, L. Tao, C. Kinchin, D. Hsu and A. Aden, *Process design and economics for biochemical conversion of lignocellulosic biomass to ethanol: dilute-acid pretreatment and enzymatic hydrolysis of corn stover*, Report NREL/TP-5100-47764, National Renewable Energy Laboratory, United States, 2011.
5. S. Sethi and M. R. Wiesner, *Environmental Engineering Science*, 2000, **17**, 61-79.
6. A. R. Costa and M. N. de Pinho, *Desalination*, 2006, **196**, 55-65.
7. S. Hall, *Rules of thumb for chemical engineers*, Elsevier, 5th edn., 2012.
8. Y. R. Cortés-Peña, D. Kumar, V. Singh and J. S. Guest, *ACS Sustainable Chemistry & Engineering*, 2020, **8**, 3302-3310.
9. Y. Cortés-Peña, W. Woodruff, S. Banerjee, Y. Li, V. Singh, C. Rao and J. Guest, *ChemRxiv*, 2024, preprint, DOI: 10.26434/chemrxiv-2023-rdvbl-v2.
10. S. Maitra, M. B. Viswanathan, K. Park, B. Kannan, S. C. Alfanar, S. M. McCoy, E. B. Cahoon, F. Altpeter, A. D. B. Leakey and V. Singh, *ACS Sustainable Chemistry & Engineering*, 2022, **10**, 16833-16844.
11. ChemCatBio, CatCost, <https://catcost.chemcatbio.org/materials-library>, (accessed 1/10, 2024).
12. FRED, Federal reserve economic data, <https://fred.stlouisfed.org/release/tables?rid=46&eid=142872&od=2022-12-01#>, (accessed 1/5, 2024).
13. Chemanalyst, Chemical prices, <https://www.chemanalyst.com/Pricing/Pricingoverview>, (accessed 9/1, 2023).
14. Businessanalytiq, Sodium hydroxide price index, <https://businessanalytiq.com/procurementanalytics/index/sodium-hydroxide-price-index/>, (accessed 9/27, 2023).
15. Chemworld, Chemworld chemicals, <https://www.CoolingTowerChemicals.com/product-p/ctc1334nm.htm>, (accessed 1/5, 2024).
16. USDA, *Agricultural prices 11/30/2023*, United States Department of Agriculture, United States, 2023.
17. P. W. Hart and J. T. Sommerfeld, *Cost engineering*, 1997, **39**, 31-35.
18. Ambeed, 5-hydroxymethyl-2-furaldehyde, <https://www.ambeed.com/products/67-47-0.html>, (accessed 2/5, 2024).
19. Chemenu, 5-Hydroxymethylfurfural, <https://www.chemenu.com/>, (accessed 1/8, 2024).
20. DOE, *Clean Cities Alternative Fuel Price Report, July 2023*, U.S. Department of Energy, 2023.
21. G. V. Research, *Furfural market size, share & trends analysis report by process, by raw material, by application, by end use, and segment forecasts, 2022-2030*, Report 978-1-68038-301-0, 2022.
22. J. Senán-Salinas, J. Landaburu-Aguirre, J. Contreras-Martinez and E. García-Calvo, *Resources, Conservation and Recycling*, 2022, **179**, 106075.
23. A. Bonton, C. Bouchard, B. Barbeau and S. Jedrzejak, *Desalination*, 2012, **284**, 42-54.

24. S. Zhang, M. Ito, J. M. Skerker, A. P. Arkin and C. V. Rao, *Applied Microbiology and Biotechnology*, 2016, **100**, 9393-9405.
25. S. Maitra, M.-H. Cheng, H. Liu, V. D. Cao, B. Kannan, S. P. Long, J. Shanklin, F. Altpeter and V. Singh, *Chemical Engineering Journal*, 2024, **487**, 150450.
26. Businessanalytiq, Glycerol price index, <https://businessanalytiq.com/procurementanalytics/index/glycerol-price-index/>, (accessed 1/8, 2024).
27. EIA, U.S. natural gas prices, [https://www.eia.gov/dnav/ng/ng\\_pri\\_sum\\_dcu\\_nus\\_a.htm](https://www.eia.gov/dnav/ng/ng_pri_sum_dcu_nus_a.htm), (accessed 1/5, 2024).
28. EIA, Electricity data browser, <https://www.eia.gov/electricity/data/browser>, (accessed 1/5, 2024).
